# Supplementary material for: Enhancement and validation of a state-of-the-art global hydrological model H08 (v.bio1) to simulate second-generation herbaceous bioenergy crop yield
Source: Copernicus journal article supplement (doi:10.5194/gmd-2019-277), 2019-11-05
Supplement: Supplementary file 1 [file gmd-2019-277-supplement.pdf]

## **Supplementary material for:**

Enhancement and validation of a state-of-the-art global hydrological model H08 (v.bio1) to simulate second-generation herbaceous bioenergy crop yield

Zhipin Ai<sup>1</sup>, Naota Hanasaki<sup>1</sup>, Vera Heck<sup>2</sup>, Tomoko Hasegawa<sup>3</sup>, Shinichiro Fujimori<sup>4</sup>

<sup>1</sup>Center for Climate Change Adaptation, National Institute for Environmental Studies, 16-2, Onogawa, Tsukuba 305-8506, Japan

<sup>2</sup>Potsdam Institute for Climate Impact Research, Telegraphenberg A 31, Potsdam 14473, Germany

<sup>3</sup>Department of Civil and Environmental Engineering, Ritsumeikan University, 56-1, Toji-in Kitamachi, Kita-ku, Kyoto 603-8577, Japan

<sup>4</sup>Department of Environmental Engineering, Kyoto University, Building C1-3, C-cluster, Kyoto-Daigaku-Katsura, Nishikyo-ku, Kyoto 615-8504, Japan

*Correspondence to:* Zhipin Ai (ai.zhipin@nies.go.jp)

| <b>ID</b> | <b>Country</b> | <b>Longitude</b> | <b>Latitude</b> |
|-----------|----------------|------------------|-----------------|
| 1         | Indonesia      | 107.70           | -7.00           |
| 2         | US             | -97.10           | 36.10           |
| 3         | US             | -88.67           | 37.45           |
| 4         | Turkey         | 33.23            | 38.17           |
| 5         | US             | -88.39           | 38.38           |
| 6         | US             | -90.82           | 39.81           |
| 7         | US             | -88.23           | 40.08           |
| 8         | US             | -88.19           | 40.17           |
| 9         | US             | -88.85           | 41.85           |
| 10        | Italy          | 10.32            | 43.67           |
| 11        | Switzerland    | 9.13             | 47.57           |
| 12        | Germany        | 10.00            | 48.00           |
| 13        | Austria        | 14.22            | 48.11           |
| 14        | Germany        | 9.97             | 48.13           |
| 15        | Austria        | 14.15            | 48.14           |
| 16        | Austria        | 16.39            | 48.18           |
| 17        | Austria        | 15.55            | 48.19           |
| 18        | Austria        | 15.00            | 48.30           |
| 19        | Germany        | 11.54            | 48.31           |
| 20        | Germany        | 10.26            | 48.49           |
| 21        | Germany        | 11.63            | 48.60           |
| 22        | Germany        | 9.00             | 48.70           |
| 23        | Germany        | 8.93             | 48.73           |
| 24        | Germany        | 8.92             | 48.75           |
| 25        | Germany        | 9.19             | 48.78           |
| 26        | Germany        | 8.10             | 49.00           |
| 27        | Germany        | 6.72             | 49.82           |
| 28        | France         | 3.00             | 49.87           |
| 29        | France         | 3.01             | 49.87           |
| 30        | Germany        | 9.90             | 49.90           |
| 31        | Germany        | 10.77            | 50.97           |
| 32        | Blegium        | 3.80             | 51.00           |
| 33        | UK             | -1.26            | 51.10           |
| 34        | Poland         | 22.63            | 51.23           |
| 35        | Germany        | 6.70             | 51.50           |
| 36        | Germany        | 6.70             | 51.52           |
| 37        | Germany        | 7.62             | 51.78           |
| 38        | UK             | -0.40            | 51.80           |
| 39        | UK             | -2.64            | 51.80           |
| 40        | UK             | -0.35            | 51.80           |
| 41        | UK             | -0.36            | 51.82           |
| 42        | UK             | -0.62            | 52.01           |

---

|    |             |       |       |
|----|-------------|-------|-------|
| 43 | UK          | -0.03 | 52.25 |
| 44 | Poland      | 16.92 | 52.42 |
| 45 | UK          | 0.09  | 52.42 |
| 46 | UK          | -4.02 | 52.43 |
| 47 | Germany     | 10.80 | 52.60 |
| 48 | Germany     | 8.26  | 52.61 |
| 49 | Germany     | 10.81 | 52.62 |
| 50 | Ireland     | -7.83 | 52.65 |
| 51 | Ireland     | -7.27 | 52.67 |
| 52 | Germany     | 8.81  | 52.68 |
| 53 | Netherlands | 7.06  | 52.88 |
| 54 | UK          | -3.78 | 53.22 |
| 55 | Netherlands | 6.95  | 53.30 |
| 56 | Poland      | 19.38 | 53.78 |
| 57 | Germany     | 12.60 | 53.90 |
| 58 | UK          | -1.11 | 54.12 |
| 59 | UK          | -0.64 | 54.12 |
| 60 | Denmark     | 9.12  | 54.90 |
| 61 | Sweden      | 14.00 | 56.00 |
| 62 | UK          | -3.06 | 56.46 |
| 63 | Denmark     | 9.60  | 56.50 |
| 64 | Denmark     | 9.40  | 56.80 |

---

Table s2. Location of the sites used to model calibration for switchgrass

| <b>ID</b> | <b>Country</b> | <b>Longitude</b> | <b>Latitude</b> |
|-----------|----------------|------------------|-----------------|
| 1         | US             | -97.70           | 28.45           |
| 2         | US             | -89.94           | 30.30           |
| 3         | US             | -87.32           | 32.00           |
| 4         | US             | -98.20           | 32.23           |
| 5         | US             | -85.90           | 32.44           |
| 6         | US             | -85.65           | 32.82           |
| 7         | US             | -87.87           | 33.88           |
| 8         | US             | -85.97           | 34.28           |
| 9         | US             | -88.90           | 35.60           |
| 10        | US             | -78.70           | 35.70           |
| 11        | US             | -83.95           | 35.88           |
| 12        | US             | -84.00           | 35.90           |
| 13        | US             | -97.07           | 36.12           |
| 14        | China          | 109.32           | 36.85           |
| 15        | US             | -78.23           | 36.92           |
| 16        | US             | -87.80           | 37.10           |
| 17        | US             | -80.40           | 37.20           |
| 18        | US             | -88.67           | 37.45           |
| 19        | China          | 118.49           | 37.46           |
| 20        | US             | -77.97           | 38.02           |
| 21        | US             | -78.10           | 38.20           |
| 22        | US             | -88.39           | 38.38           |
| 23        | US             | -88.96           | 38.95           |
| 24        | China          | 113.18           | 39.55           |
| 25        | US             | -79.90           | 39.60           |
| 26        | US             | -90.82           | 39.81           |
| 27        | US             | -75.38           | 39.92           |
| 28        | US             | -96.77           | 39.99           |
| 29        | US             | -88.23           | 40.08           |
| 30        | China          | 116.12           | 40.19           |
| 31        | US             | -78.00           | 40.70           |
| 32        | US             | -93.42           | 40.97           |
| 33        | US             | -93.40           | 41.00           |
| 34        | US             | -83.07           | 41.37           |
| 35        | US             | -83.05           | 41.50           |
| 36        | US             | -88.85           | 41.85           |
| 37        | US             | -88.90           | 41.90           |
| 38        | US             | -100.00          | 42.00           |
| 39        | US             | -93.77           | 42.02           |
| 40        | US             | -76.45           | 42.45           |
| 41        | US             | -77.00           | 42.87           |
| 42        | US             | -99.80           | 43.70           |

---

|    |         |         |       |
|----|---------|---------|-------|
| 43 | US      | -100.00 | 44.00 |
| 44 | US      | -96.70  | 44.20 |
| 45 | US      | -100.00 | 44.28 |
| 46 | US      | -96.77  | 44.32 |
| 47 | Italy   | 11.50   | 44.40 |
| 48 | US      | -73.75  | 45.47 |
| 49 | US      | -95.88  | 45.60 |
| 50 | US      | -97.23  | 46.65 |
| 51 | US      | -97.02  | 46.95 |
| 52 | US      | -100.00 | 47.00 |
| 53 | Germany | 8.93    | 48.73 |
| 54 | Blegium | 3.80    | 51.00 |
| 55 | UK      | -0.35   | 51.80 |

---

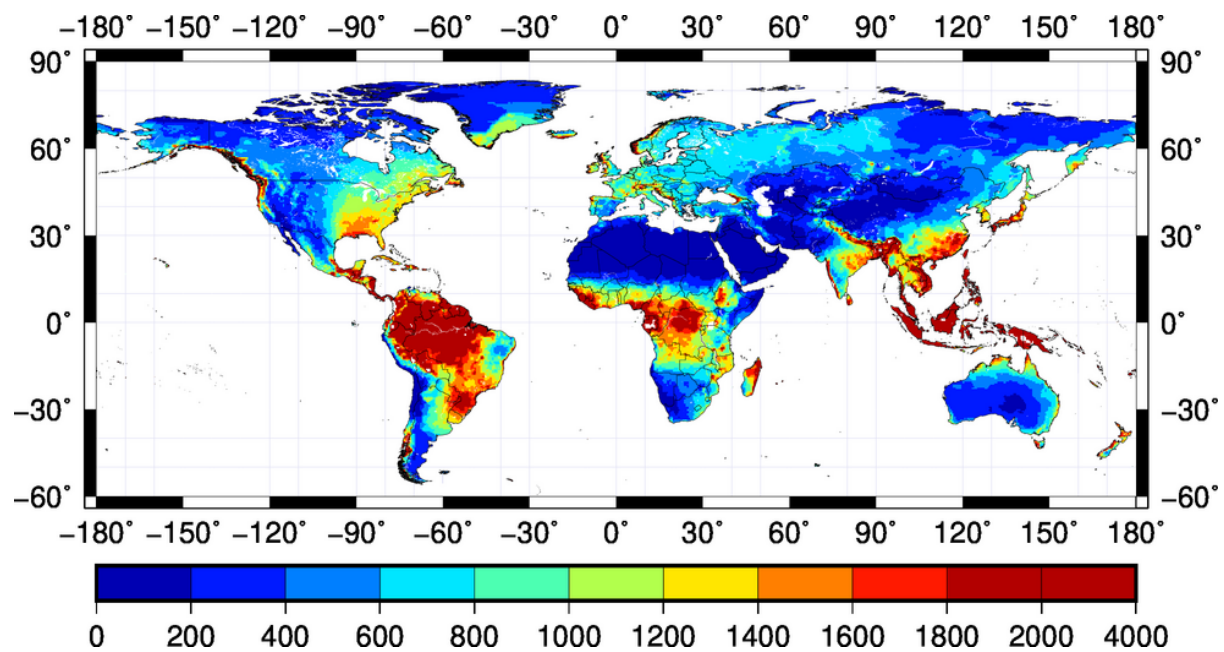

Fig. s1 Spatial distribution of averaged annual precipitation (mm yr<sup>-1</sup>) from 1979 to 2016.

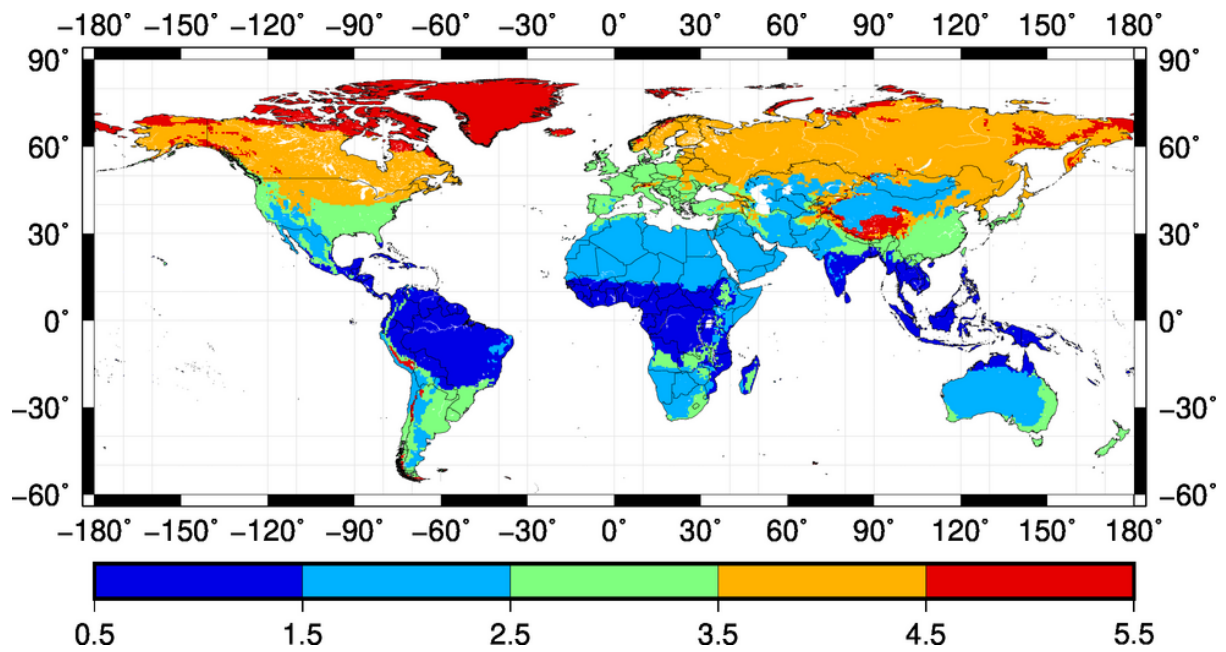

15

Fig. s2 Five different kinds of Köppen climate zones based on the average meteorological data from 1979 to 2016. The specific categories are as follows: 1 (dark blue) for tropical climate zone; 2 (light blue) for dry climate zone; 3 (green) for temperature climate zone; 4 (yellow) for continental climate zone; 5 (red) for polar climate zone.

## A brief description of the algorithms in crop growth sub-module of H08

20 To make it clear for the function of the parameters we calibrated, here we briefly describe the algorithms in the crop growth sub-module of H08. The crop module of H08 accumulates daily heat units ( $Huna(t)$ ), which are expressed as the daily mean air temperature ( $T_a$ ) greater than the plant's specific base temperature ( $T_b$ ; given as a crop-specific parameter):

$$Huna(t) = T_a - T_b \quad (1)$$

Then the heat unit index ( $Ihun$ ) is calculated as the ratio of accumulated daily heat units  $\sum Huna(t)$  and the potential heat unit ( $Hun$ ):

$$Ihun = \frac{\sum Huna(t)}{Hun} \quad (2)$$

When the accumulated daily heat units  $\sum Huna(t)$  reach the potential heat unit ( $Hun$ ) required for the maturity of the crop, the crop is mature and is harvested. During the growth period, the daily increase in biomass ( $\Delta B$ ) is calculated using a simple photosynthesis model:

$$30 \quad \Delta B = be * PAR * REGF \quad (3)$$

Where  $be$  is radiation use efficiency,  $PAR$  is photosynthetically active radiation, and  $REGF$  is the crop regulating factor.  $PAR$  is calculated using shortwave radiation ( $Rs$ ) and leaf area index ( $LAI$ ) as follow:

$$PAR = 0.02092 * Rs * [1 - \exp(-0.65 * LAI)] \quad (4)$$

$LAI$  is calculated according to the growth stage indicated by  $Ihun$ , if  $Ihun < \lfloor dpl1 \rfloor * 0.01$ ,

$$35 \quad LAI = \frac{(\lfloor dpl1 \rfloor - \lfloor dpl1 \rfloor) * Ihun}{\lfloor dpl1 \rfloor * 0.01} * blai \quad (5)$$

if  $\lfloor dpl1 \rfloor * 0.01 \leq Ihun < \lfloor dpl2 \rfloor * 0.01$ ,

$$LAI = \left\{ (\lfloor dpl1 \rfloor - \lfloor dpl1 \rfloor) + \frac{[(\lfloor dpl2 \rfloor - \lfloor dpl2 \rfloor) - (\lfloor dpl1 \rfloor - \lfloor dpl1 \rfloor)] * (Ihun - \lfloor dpl1 \rfloor * 0.01)}{\lfloor dpl2 \rfloor * 0.01 - \lfloor dpl1 \rfloor * 0.01} \right\} * blai \quad (6)$$

if  $\lfloor dpl2 \rfloor * 0.01 \leq Ihun < dlai$ ,

$$LAI = \left\{ (\lfloor dpl2 \rfloor - \lfloor dpl2 \rfloor) + \frac{[1 - (\lfloor dpl2 \rfloor - \lfloor dpl2 \rfloor)] * (Ihun - \lfloor dpl2 \rfloor * 0.01)}{dlai - \lfloor dpl2 \rfloor * 0.01} \right\} * blai \quad (7)$$



40 if  $d_{lai} < I_{hun}$ ,

$$LAI = 16 * blai (1 - I_{hun})^2 \quad (8)$$

REGF is calculated as:

$$REGF = \min (Ts, Ws, Ns, Ps) \quad (9)$$

45 Where  $Ts, Ws, Ns, Ps$  is respectively the stress factors for temperature, water, nitrogen, and phosphorous. Temperature stress ( $Ts$ ) is calculated as an asymmetrical function according to the relationship between air temperature ( $Ta$ ) and optimal temperature ( $To$ ). When air temperature is below (or equal) optimal temperature ( $To$ ),  $Ts$  is calculated as:

$$Ts = \exp\{\ln(0.9) * \left[\frac{Ctsl(To-Ta)}{Ta}\right]^2\} \quad (10)$$

Where  $Ctsl$  is the temperature stress parameter for temperature below to, and is calculated as:

$$Ctsl = \frac{To+Tb}{To-Tb} \quad (11)$$

50 When air temperature is above optimal temperature,  $Ts$  is calculated as:

$$Ts = \exp\{\ln(0.9) * \left[\frac{(To-Ta)}{Ctsh}\right]^2\} \quad (12)$$

Where  $Ctsh$  is the temperature stress parameter for temperature below to, and is calculated as:

$$Ctsh = 2 * To - Ta - Tb \quad (13)$$

Water stress ( $Ws$ ) is calculated as the ratio of actual evapotranspiration ( $Ea$ ) to potential evapotranspiration ( $Ep$ ) as:

55 
$$Ws = \frac{Ea}{Ep} \quad (14)$$

As for nitrogen and phosphorous stress, currently we take it as neglectable since the bioenergy crop yield simulated by H08 is with no constrains of nutrient.

The crop yield ( $Yld$ ) is finally estimated by the aboveground biomass ( $Bag$ ) with crop-specific harvest index ( $Harvest$ ) at the harvesting date as:

60 
$$Bag = [1 - (0.4 - 0.2 * I_{hun})] \sum \Delta B \quad (15)$$

$$Yld = Harvest * \frac{WSF}{WSF + \exp(6.117 - 0.086 * WSF)} * Bag \quad (16)$$

Where  $WSF$  is a ratio of  $SWU$  (the accumulated actual plant transpiration in the second half of the growing season), and  $SWP$  (the accumulated potential evapotranspiration accumulated actual plant transpiration):

$$WSF = \frac{SWU}{SWP} * 100 \quad (17)$$
